# Supplementary material for: The GhmiR157a–GhSPL10 regulatory module controls initial cellular dedifferentiation and callus proliferation in cotton by modulating ethylene-mediated flavonoid biosynthesis
Source: PubMed Central journal article supplement (PMC6018973; doi:10.1093/jxb/erx475), 2017-12-14
Supplement: erx475_suppl_supplementary_figures_s1-s5_tables_s1-s2.pdf [file erx475_suppl_supplementary_figures_s1-s5_tables_s1-s2.pdf]

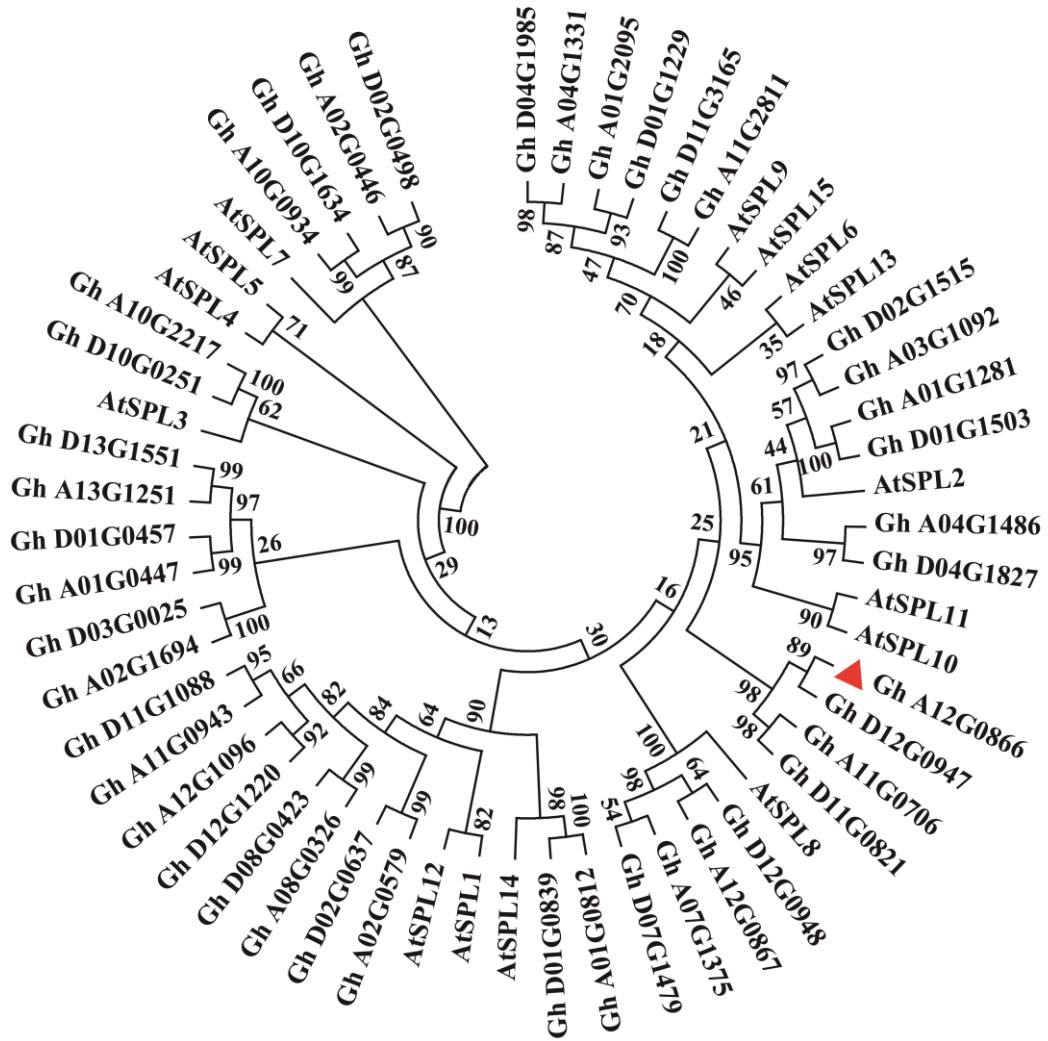

**Fig. S1.** Phylogeny of SPL proteins based on alignment of 42 SPL protein sequences in *Gossypium hirsutum* TM-1 and 15 SPLs in *Arabidopsis*. Unrooted phylogram was generated by MEGA7 software based on the neighbor-joining algorithm, with number of bootstrap replications set as 500. The red triangle indicates the *GhSPL10* focused in this study.

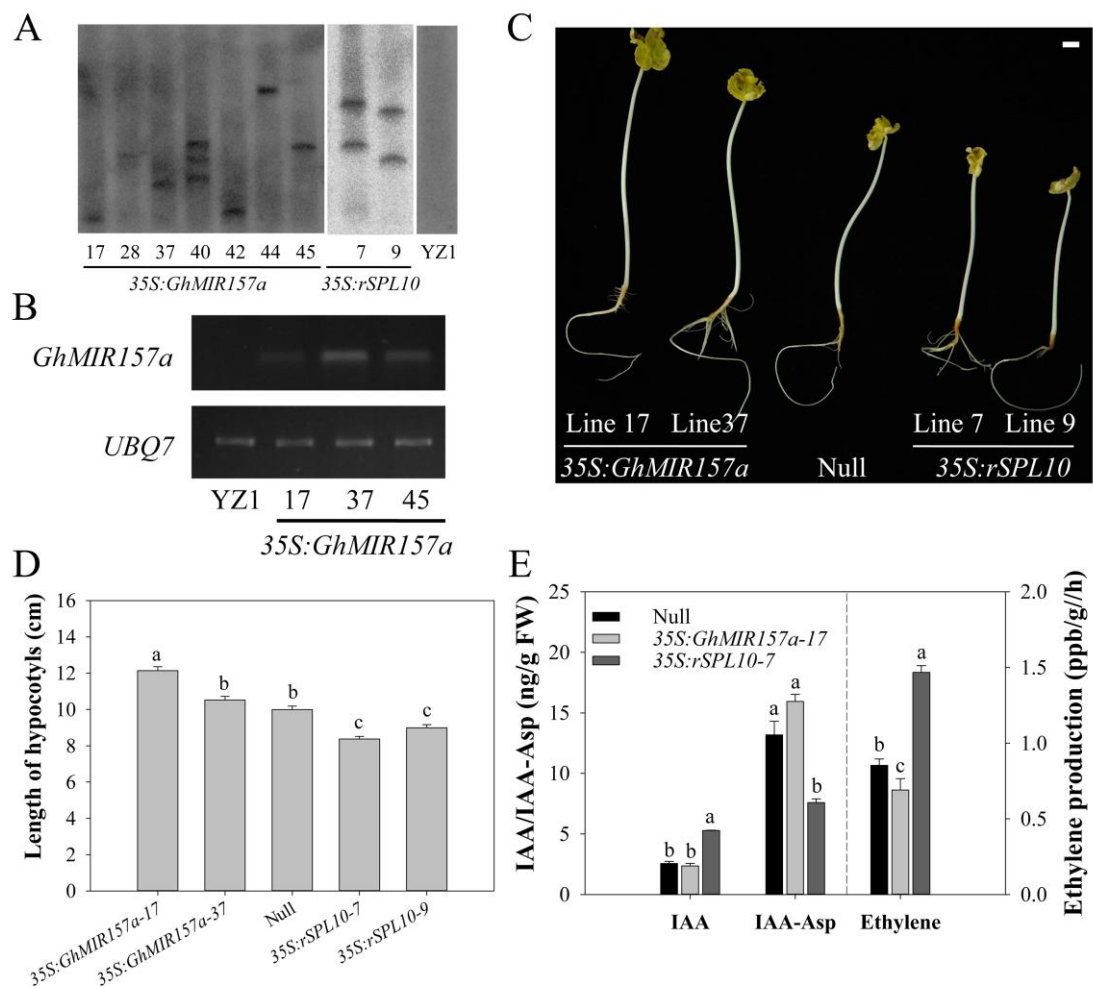

**Fig. S2.** Molecular and seedling phenotype characterization of *GhmiR157a* and *GhSPL10* overexpression lines. **(A)** Copy number identification of *GhmiR157a* and *GhSPL10* overexpression lines by Southern blotting, with YZ1 as a negative control and PCR products of *NPTII* gene as probe. **(B)** *GhmiR157a* precursor (*GhMIR157a*) detection in leaves of YZ1 and *GhmiR157a* overexpression lines by RT-PCR. *UBQ7* was used as the endogenous reference gene. **(C)** Etiolated seedling phenotype in *GhmiR157a* and *GhSPL10* overexpression lines. Scale bars = 1 cm. **(D)** Hypocotyl length of etiolated seedlings in *GhmiR157a* and *GhSPL10* overexpression lines germinated for 4 days. Error bars = mean + SE (n = 12-20). **(E)** IAA and IAA-Asp content and ethylene production in null, 35S:*GhMIR157a*-17 and 35S:*rSPL10*-7. IAA and IAA-Asp was determined in hypocotyls of 4 d-old seedlings, and ethylene production was determined using 1 d-old germinated seeds. Error bars = mean + SE (n = 2-4). Statistical significances in **(D)** and **(E)** were determined by multiple comparison,  $p < 0.05$ .

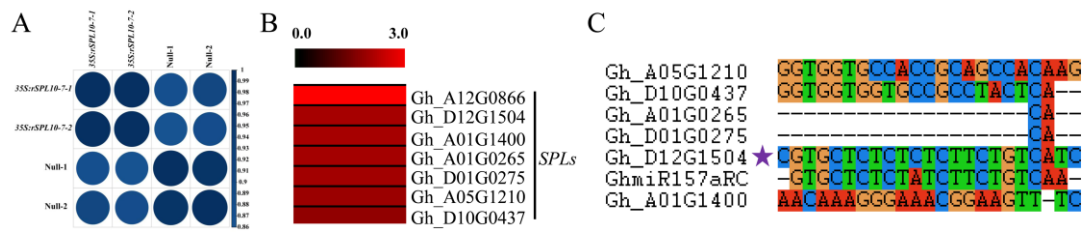

**Fig. S3.** Correlation analysis and identified differentially expressed *SPLs* by RNA-SEQ. **(A)** Correlation analysis between samples, using the Pearson method. The blue circles represent Pearson correlation coefficient (*R*) between each sample pair. **(B)** Differentially expressed *SPLs* between 35S:*rSPL10-7* and null, shown as heat map. Scale bar displayed as gradual color change from black to red represents log<sub>2</sub> (35S:*rSPL10-7*/Null) values from -3 to 3. **(C)** Alignment of *GhmiR157a* reverse complementary sequences (*GhmiR157aRC*) with differentially expressed *SPLs* identified by RNA SEQ. The purple star shows the potential *SPL* target of *GhmiR157a*. The alignment was generated by clustalX (version 1.83).

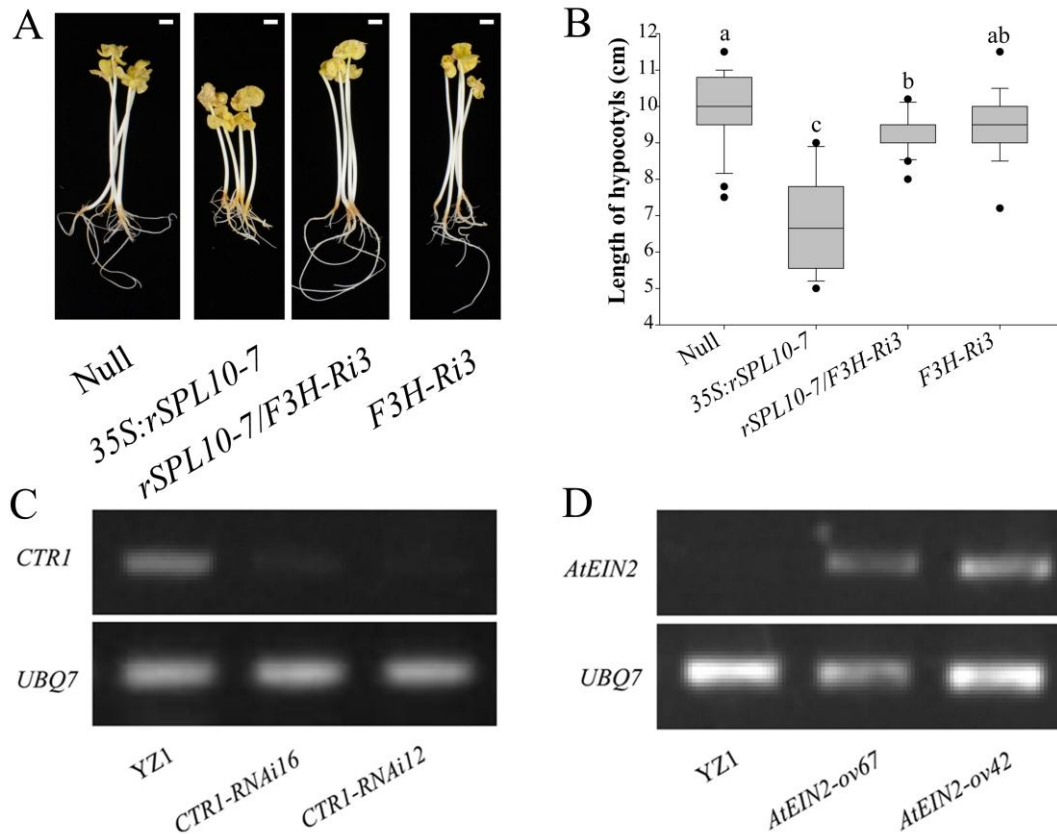

**Fig. S4.** Hypocotyl phenotype restoration in *35S:rSPL10-7* by inhibiting F3H activity, and transcription detection in *AtEIN2* overexpression and *CTR1* RNAi cotton plants. **(A)** Seedling phenotype of 5d-old etiolated seedlings of null, *35S:rSPL10-7*, *rSPL10-7/F3H-Ri3* and *F3H-Ri3* cotton plants. Scale bars = 1 cm. **(B)** Hypocotyl length of 5d-old etiolated seedlings of null, *35S:rSPL10-7*, *rSPL10-7/F3H-Ri3* and *F3H-Ri3* cotton plants. Error bars = mean + SE (n = 19-23). **(C)** Relative expression levels of *AtEIN2* in leaves of *EIN2-ov67* and 42 cotton plants, and **(D)** *CTR1* in *CTR1-RNAi16* and 12 cotton plants by RT-PCR, with YZ1 as control. *UBQ7* was used as an endogenous reference gene. Statistical significance in **(B)** and **(C)** was determined by multiple comparison,  $p < 0.05$ .

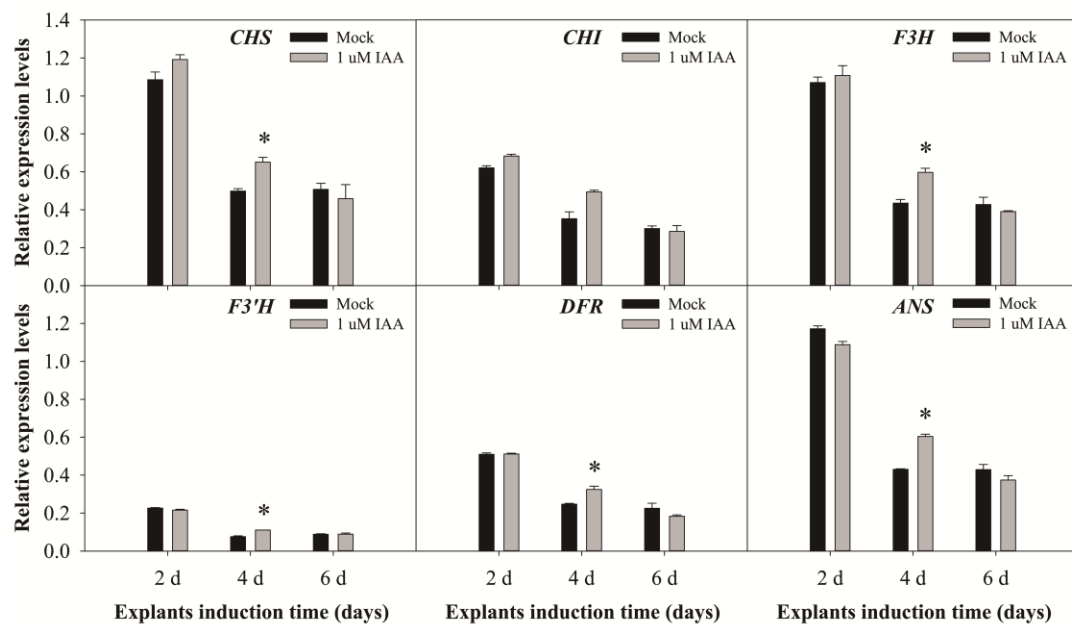

**Fig. S5.** IAA treatment promotes flavonoid biosynthesis-related gene expression. qRT-PCR of *CHS*, *CHI*, *F3H*, *F3'H*, *DFR* and *ANS* in explants of YZ1 cultured on MSB medium supplemented with 1 uM IAA for 2, 4 and 6 d respectively. Error bars represent mean and SE, statistical significance was determined by multiple comparison, \* $p < 0.05$ .

**Table S1.** List of primers used in this study.

| Category                    | Gene annotation | Gene ID     | Primer                   | Primer Sequence                                           |
|-----------------------------|-----------------|-------------|--------------------------|-----------------------------------------------------------|
| 5' RACE                     | SPL10           | Gh_A12G0866 | 3' primer                | G TTCCTTGCAGGGAATGCCACAAC                                 |
|                             |                 |             | 3' nested primer         | TAATGTGACTTGACCACCGATTTC                                  |
| In situ hybridization probe | SPL10 frag1     | Gh_A12G0866 | forward                  | ATGGAACATGATGATATGTTCATGGG                                |
|                             |                 |             | reverse                  | TGACTAGTGTAACATTACACCCTTCAAC                              |
|                             | SPL10 frag2     | forward     | ACGCTAAAGACTATCACCGGAGAC |                                                           |
|                             |                 | reverse     | CCACAATCAGCTCACGCAAGG    |                                                           |
|                             | SPL10 frag3     | forward     | AAAACCGTGCTGCTGTCCTC     |                                                           |
|                             |                 | reverse     | AATCACTTGGCATTATGGTTCA   |                                                           |
| Overexpression              | SPL10           | Gh_A12G0866 | 5' forward               | GGGGACAAGTTTGTACAAAAAAGCAGGCTGAAAGAAAAAAAA<br>AGGAGAGACAA |
|                             |                 |             | bridged-reverse          | CCTTGGAAGAGAGGAGTGACAGTGCTCGTCCTGTTGGCGACGA               |
|                             |                 |             | bridged-forward          | CAGGACGAGCACTGTCCTCTCTTCCAAGGTTGATTCTTG<br>GATC           |
|                             |                 |             | 3'reverse                | GGGGACCACTTTGTACAAGAAAGCTGGGTTTCCATGTGTTCCCT<br>TGCAGGGA  |
| RT-PCR                      | AtEIN2          | AT5G03280   | forward                  | AGTTGCTCCTGCGCTTTATTGT                                    |
|                             |                 |             | reverse                  | TTGATTCGTCTTCGTTCCCTCCT                                   |
|                             | CTR1            | Gh_D09G1340 | forward                  | CCTTAGCCAGTATCCCGACG                                      |

|         |             |             |                      |                           |
|---------|-------------|-------------|----------------------|---------------------------|
| qRT-PCR | SPL10       | Gh_A12G0866 | reverse              | AAAGCCAACGCCAACTGC        |
|         |             |             | forward              | GACTGGGAGTTTTCCGTATGTATCG |
|         | ACO         | Gh_D07G1899 | reverse              | CCACAATCAGCTCACGCAAGG     |
|         |             |             | forward              | TGGATTGGGAAAGCACATTC      |
|         |             | Gh_A07G0773 | reverse              | TTTGGACATGGTGGGTAGTTG     |
|         |             |             | forward              | TACCTTCTATTTGCGCCATC      |
|         |             | Gh_A06G1341 | reverse              | TGCCCCATAGAAAGCCTTTT      |
|         |             |             | forward              | GCTGGCTGAGAACTTTTGGGA     |
|         | CHS         | Gh_A10G1079 | reverse              | AGGGACATCAATCCATTGGT      |
|         |             |             | forward              | TGTGTGCTCGGAGATTACTGCT    |
|         | CHI         | Gh_A13G0197 | reverse              | GTTCAAACATGGGCTTCTCGAT    |
|         |             |             | forward              | TGATGCAGAAGCAAAAGCCAT     |
|         | F3H         | Gh_D12G0566 | reverse              | TCCCACCTTCTGGTACTGAGCT    |
|         |             |             | forward              | GGGCCTAGCTTGCAAGCTTCTT    |
|         | F3'H        | Gh_D12G1798 | reverse              | AAGCAAGAGTGTGATGGTGCCTGG  |
|         |             |             | forward              | AGTGGGAGTTGGCTGATGGATT    |
|         | FLS         | Gh_D05G2212 | reverse              | CTCCTCACCCCTGAAACGACAAC   |
|         |             |             | forward              | CAAGTTGTGAACCATGGCATTG    |
|         | DFR         | Gh_A05G1647 | reverse              | GCCTTCAATGGATTGAGATCCT    |
|         |             |             | forward              | CGAGGACCCTGAGAATGAAGT     |
|         | ANS         | Gh_D08G1902 | reverse              | GGCTTTTGTGTTCTGCAACAT     |
|         |             |             | forward              | GAGGCCTAGCGAGCAAAATAC     |
|         | CYCA2;2     | Gh_D06G0428 | reverse              | GTGAGCTTCGACACCGAGAG      |
|         |             |             | forward              | ACTGTTGGCCTTCAGCCTAAA     |
| CYCA3;2 | Gh_D06G0190 | reverse     | TTCTTCAACCGATGGAATCC |                           |
|         |             | forward     | ATGGCGGGTCAGGAGAATT  |                           |

|         |                     |         |                            |
|---------|---------------------|---------|----------------------------|
|         |                     | reverse | GGCTGTTGTTGTTGCTGTTGT      |
| CYCA3;4 | Gh_A12G0183         | forward | AGTTGATCAAGAGAACCGCGT      |
|         |                     | reverse | ACTTGGGCATTTCTCGATCT       |
| CYCB1;2 | Gh_D11G3346         | forward | CCTATTGTTCCCTCAACAACCC     |
|         |                     | reverse | AACTGTGCGCAAAGGACCTA       |
| CYCB1;4 | Gh_A09G1018         | forward | GCTATTGTTCCCTCAGCATGAA     |
|         |                     | reverse | TGTC AACCTGCTTTCTTTGG      |
| CYCB2;4 | Gh_D01G0881         | forward | TCCACACATGTGCATAGACCA      |
|         |                     | reverse | ATCCGGTCAATCTCCTCCAA       |
| CYCB3;1 | Gh_A08G0724         | forward | TCAAAGAAAGGCACTGTCAGA      |
|         |                     | reverse | GCACCTTGATTTAGATGGTCC      |
| CYCD1;1 | Gh_A03G1593         | forward | TCCATCAGCCGCATCTTTAT       |
|         |                     | reverse | CTCATCGGGATTGGGATAAT       |
| CDKB1;2 | Gh_Sca005019<br>G02 | forward | TACTCACTACTCCACCGCCGT      |
|         |                     | reverse | AACAGCGCGTTCCAAGTTCT       |
| CDKB2;2 | Gh_D01G0840         | forward | AGGCAAATCTCAGCAATGGA       |
|         |                     | reverse | CATCAATCTGACGACATGAGG      |
| Dpa     | Gh_A11G2912         | forward | AATCAAACGAAACCAGCGGA       |
|         |                     | reverse | TCATGCAAACCTGAATGGCGT      |
| KRP7    | Gh_A03G1676         | forward | ATGGGCGATTGTATGAGAAGC      |
|         |                     | reverse | AGTCTGCAACACTTTTCACCG      |
| LEC1    | Gh_D05G1686         | forward | GCCAACCATACGAACAGCCAC      |
|         |                     | reverse | GGACACACATTCTTGGATCGTTT    |
| LEC2    | Gh_A09G0695         | forward | CGAAGAAGGCAACGACAACAG      |
|         |                     | reverse | GTGAACCATAAGTAGAATCCATAGGC |



GhUBQ7 Gh\_A11G0969 forward  
reverse

GAAGGCATTCCACCTGACCAAC  
CTTGACCTTCTTCTTGTGCTTG

---

**Table S2.** Summary statistics of sequencing and mapping.

| Sample Name           | Clean reads | Genome map Rate | Gene map Rate | Expressed Gene |
|-----------------------|-------------|-----------------|---------------|----------------|
| Null-1                | 12154146    | 86.87%          | 69.37%        | 50359          |
| Null-2                | 12162581    | 86.60%          | 69.84%        | 51011          |
| <i>35S:rSPL10-7-1</i> | 12163262    | 86.74%          | 71.34%        | 50911          |
| <i>35S:rSPL10-7-2</i> | 12160933    | 86.56%          | 71.83%        | 51216          |
